# Supplementary material for: Expression of osteopontin, matrix metalloproteinase-2 and -9 proteins in vascular instability in brain arteriovenous malformation
Source: PeerJ. 2019 Jun 24;7:e7058. doi: 10.7717/peerj.7058 (PMC6596408; doi:10.7717/peerj.7058)
Supplement: Supplemental Information 4 — Tables of OPN, MMP-2 and -9 to generate box plots. [file peerj-07-7058-s004.xlsx]

## Sheet: Sheet1
	OPN
	OPN_PRE	CONTROL	OPN_POST	CONTROL				OPN_PRE	CONTROL	OPN_POST
	0.3119	0.3101	0.3103	0.3101			MIN	0.3099	0.3101	0.3103
	0.3127	0.313	0.3137	0.313			Q1	0.310675	0.31035	0.3108
	0.3099	0.3106	0.3106	0.3106			MEDIAN	0.31155	0.3106	0.3119
	0.3176		0.3124				Q3	0.3125	0.3118	0.312775
	0.3105		0.3129				MAX	0.3176	0.313	0.3137
	0.3112		0.3114
							MEAN	0.3123	0.311233	0.311883
							RANGE	0.0077	0.0029	0.0034
	MMP-2
	MMP-2_PRE	CONTROL	MMP-2_POST	CONTROL				MMP-2_PRE	CONTROL	MMP-2_POST
	24120	2053	30040	2053			MIN	0	2053	0
	22910	3105	35800	3105			Q1	23212.5	2622	28202.5
	19800	3088	27220	3088			MEDIAN	27395	3009	34950
	31560	2622	34100	2622			Q3	30557.5	3088	37992.5
	28780	3009	27590	3009			MAX	41350	3105	269710
	26660		269710
	41350		54740				MEAN	25446	2775.4	55515
	28130		38010				RANGE	41350	1052	269710
	0		0
	31150		37940
	MMP-9
	MMP-9_PRE	CONTROL	MMP-9_POST	CONTROL				MMP-9_PRE	CONTROL	MMP-9_POST
	3242	97.33	9314	97.33
	844.3	72.11	6121	72.11			MIN	844.3	66.94	870.3
	4538	132.3	4967	132.3			Q1	3402.25	72.11	3287
	8256	66.94	5058	66.94			MEDIAN	4551	97.33	5589.5
	6798	118.7	2727	118.7			Q3	7891.5	118.7	9453.5
	13430		13810				MAX	13430	132.3	13810
	4564		10060
	9659		1940				MEAN	5794.53	97.476	6436.73
	2731		870.3				RANGE	12585.7	65.36	12939.7
	3883		9500
